# Supplementary material for: Identification of Fusarium oxysporum f. sp. lactucae Race 1 as the Causal Agent of Lettuce Fusarium Wilt in Greece, Commercial Cultivars’ Susceptibility, and Temporal Expression of Defense-Related Genes
Source: MDPI journal article supplement (doi:10.3390/microorganisms11041082), 2023-04-20
Supplement: s1 [file s1]

**Table S1. Reaction of lettuce cultivars to isolates associated with the four races of *Fusarium oxysporum* f. sp. *lactucae* and expressed as disease severity index.**

| Cultivar         | Type        | Isolate                |    |                       |    |                        |    |                        |    |                           |    |                       |    |           |    |          |    |                |    |           |    |
|------------------|-------------|------------------------|----|-----------------------|----|------------------------|----|------------------------|----|---------------------------|----|-----------------------|----|-----------|----|----------|----|----------------|----|-----------|----|
|                  |             | Race 1                 |    |                       |    | Race 2                 |    |                        |    | Race 3                    |    |                       |    | Race 4    |    |          |    | Greek Isolates |    |           |    |
|                  |             | MAFF 244120<br>(Japan) |    | Fus 1.39<br>(Belgium) |    | MAFF 244121<br>(Japan) |    | MAFF 244122<br>(Japan) |    | 04750888<br>(Netherlands) |    | Fus 1.01<br>(Belgium) |    | GTFus1    |    | GTFus2   |    | GTFus3         |    | GTFus4    |    |
| Accra            | Iceberg     | 29.6±5.4 <sup>a</sup>  | PR | 32.3±5.7              | S  | 0.0±0.0                | R  | 4.6±2.1                | R  | 11.2±3.3                  | PR | 37.8±6.1              | S  | 52.6±6.5  | S  | 82.1±9.1 | HS | 62.6±7.9       | HS | 67.1±8.2  | HS |
| Siberinas        | Iceberg     | 31.2±8.8               | S  | 100.0±0.0             | HS | 84.7±6.6               | HS | 5.2±1.1                | R  | 61.3±4.6                  | HS | 29.6±2.1              | PR | 81.6±4.6  | HS | 66.8±4.2 | HS | 58.4±4.4       | S  | 82.6±3.3  | HS |
| Antolina         | Butterhead  | 72.5±3.9               | HS | 88.8±5.5              | HS | 53.1±11.2              | S  | 94.2±1.8               | HS | 78.6±9.1                  | HS | 93.2±0.7              | HS | 37.2±2.2  | S  | 26.6±5.2 | S  | 19.8±2.6       | S  | 11.6±5.6  | S  |
| Sandalina        | Butterhead  | 22.7±4.8               | PR | 9.8±3.1               | R  | 15.1±3.9               | PR | 4.9±2.2                | R  | 12.4±3.5                  | PR | 0.0±0.0               | R  | 0.0±0.0   | R  | 0.0±0.0  | R  | 0.0±0.0        | R  | 7.6±1.1   | R  |
| Cencibel         | Lollo rossa | 0.0±0.0                | R  | 40.6±9.8              | S  | 47.2±6.9               | S  | 4.4±0.7                | R  | 9.8±2.1                   | R  | 26.3±2.2              | PR | 91.1±11.2 | HS | 91.2±9.6 | HS | 100.0±0.0      | HS | 84.9±12.1 | HS |
| Lugano           | Lollo rossa | 11.2±4.3               | PR | 82.8±11.1             | HS | 52.3±8.8               | S  | 65.8±4.7               | S  | 91.1±5.4                  | HS | 49.7±9.2              | S  | 94.6±2.3  | HS | 82.2±8.8 | HS | 68.6±4.6       | HS | 87.6±6.1  | HS |
| Grazion          | Batavia     | 6.4±2.5                | R  | 65.6±8.6              | HS | 0.0±0.0                | R  | 0.0±0.0                | R  | 73.9±11.2                 | HS | 75.2±8.6              | HS | 44.6±2.3  | S  | 41.9±6.5 | S  | 74.6±2.3       | HS | 64.9±8.1  | HS |
| Starfighter      | Batavia     | 11.1±5.5               | PR | 82.4±12.8             | HS | 0.0±0.0                | R  | 54.2±4.6               | S  | 81.3±9.6                  | HS | 29.6±5.4              | PR | 6.2±2.1   | R  | 9.2±3.1  | R  | 8.8±2.1        | R  | 7.1±8.4   | R  |
| Kireve           | Oakleaf     | 74.6±8.6               | S  | 71.9±8.7              | HS | 4.6±2.2                | R  | 9.7±3.1                | R  | 6.1±2.5                   | R  | 53.8±7.3              | S  | 6.3±2.5   | R  | 16.3±4.0 | PR | 19.4±4.4       | PR | 14.9±3.9  | PR |
| Prunai           | Oakleaf     | 48.8±9.1               | S  | 100.0±0.0             | HS | 35.6±4.2               | S  | 71.1±4.4               | HS | 96.8±0.6                  | HS | 81.2±4.4              | HS | 41.2±5.6  | S  | 58.8±4.4 | S  | 48.1±3.3       | S  | 83.6±7.4  | HS |
| Tacitus          | Romaine     | 3.2±0.4                | R  | 9.8±1.8               | R  | 9.8±3.1                | R  | 0.0±0.0                | R  | 21.1±4.6                  | PR | 23.8±8.3              | PR | 26.4±4.4  | PR | 25.5±8.7 | PR | 7.6±1.2        | R  | 13.8±5.5  | PR |
| Tanius           | Romaine     | 11.2±3.3               | PR | 18.8±4.3              | PR | 54.4±7.4               | S  | 0.0±0.0                | R  | 17.2±4.1                  | PR | 12.1±3.5              | PR | 33.6±1.9  | S  | 50.6±7.1 | S  | 62.3±7.9       | HS | 49.3±4.4  | S  |
| Cavolo di Napoli | Loose-leaf  | 58.7±8.3               | S  | 71.6±5.1              | HS | 52.6±3.4               | S  | 72.9±3.1               | HS | 61.4±4.4                  | HS | 42.1±4.4              | S  | 55.6±3.6  | S  | 51.9±3.1 | S  | 54.7±2.3       | S  | 66.8±8.2  | HS |
| Patriot          | Iceberg     | 41.6±5.4               | S  | 78.8±2.8              | HS | 66.7±5.3               | HS | 76.4±3.9               | HS | 52.5±5.5                  | S  | 41.8±5.7              | S  | 58.7±5.9  | S  | 53.7±5.3 | S  | 50.0±2.0       | S  | 62.0±3.2  | HS |
| Costa Rica No. 4 | Romaine     | 18.9±5.6               | PR | 9.3±3.1               | R  | 73.2±3.1               | HS | 68.9±5.4               | HS | 88.7±2.2                  | HS | 92.4±0.7              | HS | 5.6±4.4   | R  | 0.0±0.0  | R  | 0.0±0.0        | R  | 0.0±0.0   | R  |
| Banchu Red Fire  | Butterhead  | 49.8±2.9               | S  | 31.6±4.8              | S  | 8.7±4.4                | R  | 38.9±1.9               | S  | 24.7±3.1                  | PR | 25.1±5.4              | PR | 41.6±4.6  | S  | 53.8±5.4 | S  | 38.8±4.4       | S  | 32.8±3.1  | S  |
| Romana           |             |                        |    |                       |    |                        |    |                        |    |                           |    |                       |    |           |    |          |    |                |    |           |    |
| Romabella        | Romaine     | 8.8±1.1                | R  | 5.4±2.4               | R  | 0.0±0.0                | R  | 78.8±3.1               | HS | 54.4±4.6                  | S  | 56.6±6.6              | S  | 12.9±1.1  | PR | 11.4±4.5 | PR | 6.6±0.9        | R  | 0.0±0.0   | R  |
| 30 CN            |             |                        |    |                       |    |                        |    |                        |    |                           |    |                       |    |           |    |          |    |                |    |           |    |

<sup>a</sup> Values expressed as mean disease index scores ± standard deviation. DI scale 0–100: R, resistant=0–10; PR, partially resistant=11–30; S, susceptible=31–60; HS, highly susceptible=61–100.

**Table S2. List of primer sequences used for gene expression analysis in real-time quantitative polymerase chain reaction (RT-qPCR) assays.**

| Primer name      | Primer Sequence (5'→3')  | Gene                                                                       | Reference | NCBI ID/<br>Lettuce ID (Lsa)* |
|------------------|--------------------------|----------------------------------------------------------------------------|-----------|-------------------------------|
| <b>HPL1.For</b>  | CGTTAGGATCCGCCGACCGC     | Fatty acid hydroperoxide lyase ( <i>HPL1</i> )                             |           | XM_023907774.1                |
| <b>HPL1.Rev</b>  | TCCTTCCTTGCCCGCCCGTA     |                                                                            |           |                               |
| <b>LTC1.For</b>  | AACGAGGGATGCCTTAAGCC     | Sesquiterpene synthase ( <i>LTC1</i> )                                     | [36]      | AF489964                      |
| <b>LTC1.Rev</b>  | CCCGGAAAAGTAAACCCATCG    |                                                                            |           |                               |
| <b>SOD.For</b>   | CTTCCAGCCTTCAACAACGC     | Superoxide dismutase ( <i>SOD</i> )                                        |           | AJ310450.1                    |
| <b>SOD.Rev</b>   | ATTAGGCCTCCAAACGAGCC     |                                                                            |           |                               |
| <b>ERF1.For</b>  | TCGCCGGTGATGTCCAGTTATCAA | Ethylene response factor 1 ( <i>ERF1</i> )                                 |           | Lsa016859.1                   |
| <b>ERF1.Rev</b>  | TGTTTCCCTCTCTGCTGGTTCACA |                                                                            |           |                               |
| <b>PRB1.For</b>  | ATGGGACAGTCGTGTGGCTAGTTT | Basic pathogenesis-related 1 ( <i>PRB1</i> )                               |           | Lsa018589.1                   |
| <b>PRB1.Rev</b>  | TGTTACAGCATCTACACCGGTCA  |                                                                            |           |                               |
| <b>PAL1.For</b>  | TGGCCCCACCGGAGAAGTCC     | Phenylalanine ammonia lyase 1 ( <i>PAL1</i> )                              |           | Lsa044239.1                   |
| <b>PAL1.Rev</b>  | GGAAGCCATCCCGGACCCCA     |                                                                            |           |                               |
| <b>LOX.For</b>   | GCAACTAAGCGTGCTTCACCCAAT | Lipoxygenase ( <i>LOX</i> )                                                | [35]      | Lsa036946.1                   |
| <b>LOX.Rev</b>   | TGCCTCAAGAAGACCTCCACCATT |                                                                            |           |                               |
| <b>MPK.For</b>   | GGCGGACTTGAACGGAGGAGC    | Mitogen-activated protein kinase ( <i>MPK</i> )                            |           | Lsa036022.1                   |
| <b>MPK.Rev</b>   | AGCGAACGAAGTGGCCTCCA     |                                                                            |           |                               |
| <b>BG.For</b>    | TCAGCCGGTGCATTTGGAGCA    | $\beta$ -glucanase ( <i>BG</i> )                                           |           | Lsa037249.1                   |
| <b>BG.Rev</b>    | ACCCTGTGACGCGTGTGCAA     |                                                                            |           |                               |
| <b>GST.For</b>   | CCCGGCGGTTGAAGACGGTG     | Glutathione S-transferase ( <i>GST</i> )                                   |           | Lsa035144.1                   |
| <b>GST.Rev</b>   | ACACTGATTGCTCCGCCGCC     |                                                                            |           |                               |
| <b>Actin.For</b> | AACTGGAATGGTGAAGGCTGG    | <i>Lactuca sativa</i> putative actin 7<br>( <i>Actin</i> , Reference gene) | [36]      | XM_023905463                  |
| <b>Actin.Rev</b> | TTGTAGAAAGTGTGATGCCA     |                                                                            |           |                               |

\*Accession numbers of sequences submitted to the National Center for Biotechnology Information (NCBI) and lettuce ID (Lsa).
